# Supplementary material
Source: publisher figshare collection journal article supplement (https://acs.figshare.com/ndownloader/files/3910552)
Supplement: Supplementary file 1 [file 3910552]

# pH-Induced Motion Control of Self-Propelled Oil Droplets Using a Hydrolysable Gemini Cationic Surfactant

Shingo Miura<sup>1</sup>, Taisuke Banno<sup>1</sup>, Taishi Tonooka<sup>2</sup>, Toshihisa Osaki<sup>2, 3</sup>, Shoji Takeuchi<sup>2</sup>, Taro Toyota<sup>1, 4\*</sup>

<sup>1</sup> Department of Basic Science, Graduate School of Arts and Sciences, The University of Tokyo, 3-8-1 Komaba, Meguro, Tokyo 153-8902, Japan. E-mail: cttoyota@mail.ecc.u-tokyo.ac.jp

<sup>2</sup> Institute of Industrial Science, The University of Tokyo, 4-6-1 Komaba, Meguro-ku, Tokyo 153-8505, Japan.

<sup>3</sup> Kanagawa Academy of Science and Technology, 3-2-1 Sakado, Takatsu-ku, Kanagawa 213-0012, Japan.

<sup>4</sup> Precursory Research for Embryonic Science and Technology (PRESTO), Japan Science and Technology Agency, 4-1-8 Honcho, Kawaguchi, Saitama 332-0012, Japan.

## Supporting Information

### Figures

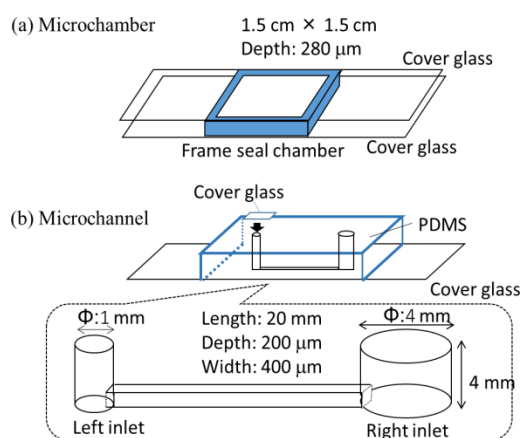

**Figure S1.** Schematic representation of (a) a microchamber made from two cover glasses and a frame seal chamber and (b) a microchannel composed of PDMS with a cover glass.

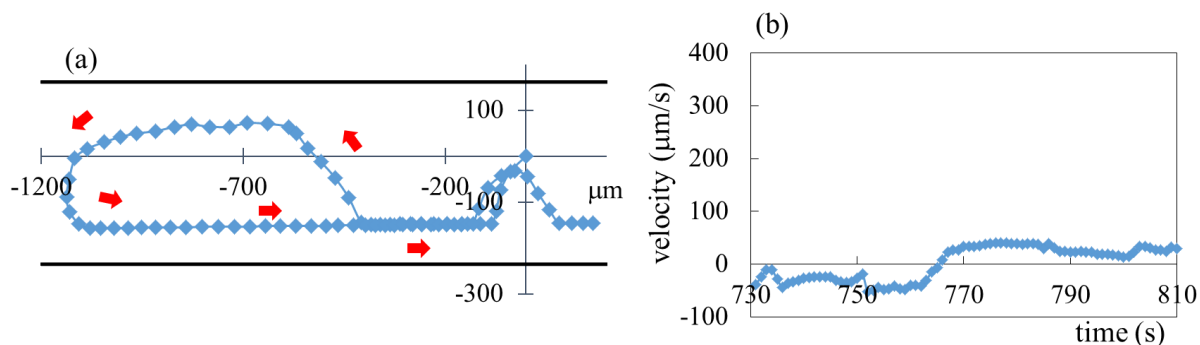

**Figure S2.** Typical trajectory of the center of an oil droplet (a) and velocity of the self-propelled oil droplet (b) in the microchannel at room temperature in 30 mM **2G12C** solution with the presence of 10 mM NaOH. Red arrows correspond to the direction of the self-propelled oil droplet (Movie S2). Each dot was plotted by every 1 s interval.

We observed the dynamics of **HBA** oil droplets in the microchannel without additional NaOH solution. After putting emulsion which contains **HBA** oil droplets in 30 mM **2G12C** solution into microchannel, we carried out observation of oil droplet dynamics. We analyzed the trajectory of the center of oil droplets and velocity of self-propelled oil droplets from 730 s to 810 s after the start of the observation. In this time, we regarded the time when emulsion was put into microchannel as  $t = 0$ . In this graph we defined the right and upper sides of microchannel as plus direction. It was observed that oil droplets with diameter of 100-200  $\mu\text{m}$  were self-propelled changing its direction. The absolute value of the velocity of oil droplets was below 50  $\mu\text{m/s}$ .

## Table

**Table S1.** Motion time of the self-propelled oil droplets in various surfactant solutions under basic conditions (10 mM NaOH) at room temperature

| Surfactant                  | Average motion time<br>with standard deviation (min) |
|-----------------------------|------------------------------------------------------|
| <b>2G12C</b> <sup>[a]</sup> | 23 ± 6                                               |
| <b>6G12C</b> <sup>[a]</sup> | n.o. <sup>[c]</sup>                                  |
| <b>8G12</b> <sup>[a]</sup>  | 5 ± 0.8                                              |
| <b>12G12</b> <sup>[a]</sup> | n.o. <sup>[c]</sup>                                  |
| <b>DTAB</b> <sup>[b]</sup>  | 7 ± 1.2                                              |
| <b>2H12</b> <sup>[b]</sup>  | 5 ± 3                                                |

[a] The concentration of the gemini cationic surfactants was 30 mM. [b] The concentration of the monomeric surfactants was 60 mM. [c] n.o.: self-propelled oil droplets were not observed.

## Video clips

Six video clips have been attached to show the directed motion of oil droplets composed of **HBA** in microchannel in the solution of gemini cationic surfactant. All movies except for Movie S1 were recorded by 1 frame/s and converted to 10 times speed of real time. Movie S1 was recorded by the real time speed.

**Movie S1:** Typical self-propelled motion of oil droplets in microchamber in 30 mM **2G12C** solution and convection flow inside oil droplets.

**Movie S2:** Typical self-propelled motion of an oil droplet in microchannel in 30 mM **2G12C** solution in the presence of 10 mM NaOH

**Movie S3:** Typical directed motion of an oil droplet in microchannel in the presence of NaOH flow in 10 mM **2G12C**. It initiated self-propelled motion toward high concentration area of NaOH solution and then ceased the motion. After that it restarted self-propelled motion toward the same direction.

**Movie S4:** Typical directed motion of an oil droplet in microchannel in the presence of NaOH flow in 10 mM **2G12C**. Both solutions of NaOH and **2G12C** were colored by 0.05 wt% BTB. It initiated self-propelled motion toward high concentration area of NaOH solution and then ceased the motion. After that it restarted self-propelled motion toward the same direction.

**Movie S5:** Typical directed motion of an oil droplet in microchannel in the presence of NaOH flow in 10 mM **8G12**. It initiated self-propelled motion toward high concentration area of NaOH solution, and then ceased the motion.

**Movie S6:** Typical directed motion of an oil droplet in microchannel in the presence of NaOH flow in 10 mM **8G12**. Both solutions of NaOH and **8G12** were colored by 0.05 wt% BTB. It initiated self-propelled motion toward high concentration area of NaOH solution, and then ceased the motion.
